# Supplementary material for: Monthly Variation of Tetrodotoxin Levels in Pufferfish (Lagocephalus sceleratus) Caught from Antalya Bay, Mediterranean Sea
Source: MDPI journal article supplement (doi:10.3390/md21100527), 2023-10-05
Supplement: s1 [file s1]

# Monthly variation of Tetrodotoxin levels in pufferfish (*Lagocephalus sceleratus*) caught from Antalya Bay, Mediterranean Sea

## Supplementary material

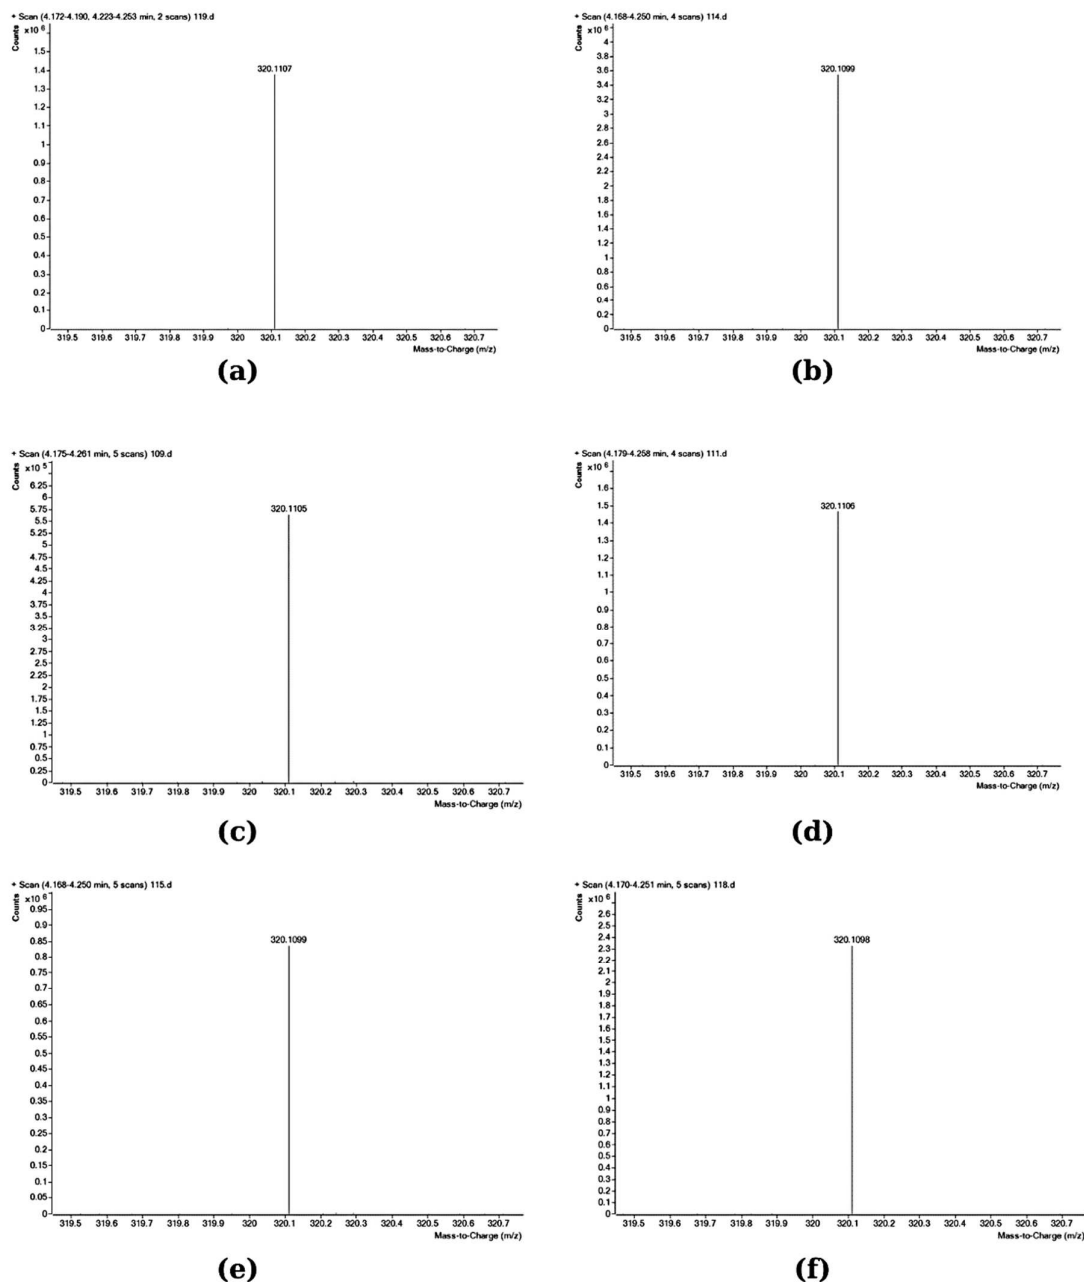

Figure S1: TTX spectra of different pufferfish samples: (a) male, gonad; (b) female, gonad; (c) female, muscle; (d) female, liver; (e) male muscle; (f) male, liver
